# Supplementary material
Source: Research Square preprint supplement (doi:10.21203/rs.3.rs-8936009/v1)
Supplement: Supplementary file 1 [file 7db1531c147545f1320205cf.xlsx]

## Sheet: Sheet1
Column1	Column2	Column3	Column4	Column5	Column6
Diagnosis	Patient Age	Sex	Type of Disease	Underlying Risk Factor	Tissue Source
Mycobacterial infection 1	57	Male	Diseminated mycobacterial infection	HIV/AIDS	Lymph Node
Mycobacterial infection 2	12	Male	Necrotizing granulomatous lymphadenitis	N/A	Lymph Node
Mucormycosis 1	54	Male	Rhinocerebral mucormycosis	Diabetic ketoacidosis	Palatal soft tissue
Mucormycosis 2	N/A	N/A	Pulmonary mucormycosis	Acute myelogenous leukemia	Lung tissue
Mucormycosis 3	65	Male	Rhinocerebral mucormycosis	Non small cell lung cancer	Nasal tissue
Mucormycosis 4	80	Male	Cutaneous mucormycosis	COVID-19	Facial Skin
Mucormycosis 5	70	Male	Cutaneous mucormycosis	Septic shock	Facial Skin
Mucormycosis 6	65	Female	Rhinocerebral mucormycosis	B-cell chronic lymphocytic leukemia	Nasal tissue
